# Supplementary material for: Gene-Set Enrichment Analysis of Differentially Expressed Genes in the Transcriptome of the Human Corneal Endothelium in Association with Age Effecta
Source: Preprints.org preprint supplement (doi:10.20944/preprints201806.0245.v1), 2018-06-15
Supplement: Supplementary file 1 [file supplementary]

## Sheet: Sheet1
miRTarBase 2017
Index	Name	P-value	Adjusted p-value	Z-score	Combined score
1	hsa-miR-934	0.004592	0.04362	-2.76	14.88
2	mmu-miR-3090-3p	0.004592	0.04362	-2.37	12.76
3	hsa-miR-3657	0.008175	0.04362	-2.55	12.26
4	hsa-miR-3618	0.006186	0.04362	-2.39	12.14
5	hsa-miR-3150a-5p	0.005389	0.04362	-2.31	12.08
TargetScan microRNA 2017
Index	Name	P-value	Adjusted p-value	Z-score	Combined score
1	mmu-let-7a	0.003499	0.0799	-3.48	19.68
2	mmu-let-7b	0.003499	0.0799	-3.46	19.59
3	mmu-let-7c	0.003499	0.0799	-3.46	19.58
4	mmu-let-7d	0.003499	0.0799	-3.45	19.53
5	mmu-let-7e	0.003499	0.0799	-3.44	19.47
TRANSFAC and JASPAR PWMs
Index	Name	P-value	Adjusted p-value	Z-score	Combined score
1	NR1H3 (human)	0.001257	0.09427	-1.8	12.05
2	HOXA5 (human)	0.01197	0.2322	-1.89	8.35
3	RORB (human)	0.01497	0.2322	-1.79	7.52
4	NR2F1 (human)	0.01605	0.2322	-1.8	7.46
5	APEX1 (human)	0.02574	0.2322	-1.74	6.37
